# Supplementary material
Source: PubMed Central journal article supplement (PMC11378967)
Supplement: NIHMS2014306-supplement-Tables.pdf [file NIHMS2014306-supplement-Tables.pdf]

# Frailty Explains Variation in Emergency Department Use for Older Veterans During the COVID-19 Pandemic: Supplemental Content (Tables & Figures)

**Table 1.** Baseline Demographic and Clinical Characteristics (n=38,871)

|                                                                                             |                |
|---------------------------------------------------------------------------------------------|----------------|
| Age, mean (SD)                                                                              | 80.3 (7.3)     |
| Age, n (%)                                                                                  |                |
| 65-75                                                                                       | 10,366 (26.7)  |
| 75-84                                                                                       | 16,168 (41.6)  |
| 85 or higher                                                                                | 12,337 (31.7)  |
| Male, n (%)                                                                                 | 38,529 (99.1%) |
| Race, n (%)                                                                                 |                |
| Black race                                                                                  | 7,107 (18.3)   |
| White race                                                                                  | 31,353 (80.7)  |
| Other <sup>1</sup>                                                                          | 411 (1.1)      |
| Ethnicity, n (%)                                                                            |                |
| Hispanic                                                                                    | 1,856 (4.8)    |
| Non-Hispanic                                                                                | 37,015 (95.2)  |
| Marital status, n (%)                                                                       |                |
| Married                                                                                     | 24,205 (62.3)  |
| Widowed/divorced/never married/separated                                                    | 14,666 (37.7)  |
| Geocoded location, n (%)                                                                    |                |
| Rural/highly rural                                                                          | 10,629 (27.3)  |
| Urban                                                                                       | 28,242 (72.7)  |
| Area deprivation index rank, n (%)                                                          |                |
| 0-25% (least disadvantaged neighborhoods)                                                   | 6,727 (17.3)   |
| 26-50%                                                                                      | 12,226 (31.5)  |
| 51-75%                                                                                      | 11,243 (28.9)  |
| 76-100% (most disadvantaged neighborhoods)                                                  | 8,675 (22.3)   |
| Any inpatient stay in prior year, n (%)                                                     | 5,815 (15.0)   |
| Number of inpatient stays prior year, mean (SD)                                             | 0.3 (0.8)      |
| Priority level, n (%)                                                                       |                |
| High disability (groups 1 and 4)                                                            | 12,216 (31.4)  |
| Low/moderate disability (groups 2, 3, and 6)                                                | 7,194 (18.5)   |
| Low income (group 5)                                                                        | 9,778 (25.2)   |
| No disability (group 7 and 8)                                                               | 9,683 (24.9)   |
| Service connection <sup>2</sup> , n (%)                                                     |                |
| Not service connected                                                                       | 20,609 (53.2)  |
| Service connected 0-49%                                                                     | 6,981 (18.0)   |
| Service connected 50-99%                                                                    | 6,858 (17.7)   |
| Service connected 100%                                                                      | 4,309 (11.1)   |
| <i>Aid and Attendance benefit</i> <sup>2</sup> , n (%)                                      | 1,022 (2.6)    |
| Distance from nearest VA primary care clinic, mean (SD)                                     | 14.8 (14.4)    |
| Care Assessment Need (CAN) score, admission risk at 1 year $\geq$ 75 <sup>2,3</sup> , n (%) | 17,177 (44.2)  |
| Multiple chronic conditions (2 or more, of 19 below), n (%)                                 | 34,357 (88.4)  |
| Anemia, n (%)                                                                               | 9,204 (23.7)   |
| Asthma, n (%)                                                                               | 1,524 (3.9)    |
| Prostatic hyperplasia, n (%)                                                                | 12,910 (33.2)  |
| Cerebral vascular accident, n (%)                                                           | 4,155 (10.7)   |

|                                              |               |
|----------------------------------------------|---------------|
| Chronic renal failure, n (%)                 | 8,526 (21.9)  |
| Chronic obstructive pulmonary disease, n (%) | 8,057 (20.7)  |
| Congestive heart failure, n (%)              | 5,010 (12.9)  |
| Dementia or cognitive impairment, n (%)      | 4,864 (12.5)  |
| Depression, n (%)                            | 6,336 (16.3)  |
| Diabetes, n (%)                              | 16,385 (42.2) |
| Gastro-esophageal reflux disease, n (%)      | 11,641 (29.9) |
| Hypertension, n (%)                          | 32,405 (83.4) |
| Ischemic heart disease, n (%)                | 13,416 (34.5) |
| Obesity, n (%)                               | 6,465 (16.6)  |
| Osteoporosis, n (%)                          | 1,394 (3.6)   |
| Peripheral vascular disease, n (%)           | 4,174 (10.7)  |
| Post-traumatic stress disorder, n (%)        | 4,661 (12.0)  |
| Spinal cord injury, n (%)                    | 68 (0.2)      |
| Traumatic brain injury, n (%)                | 489 (1.3)     |
| Jen Frailty Index (JFI) score, n (%)         |               |
| Low frailty (score 0–3)                      | 18,648 (48.0) |
| Moderate frailty (4–5)                       | 12,271 (31.6) |
| High frailty (6–7)                           | 5,970 (15.4)  |
| Very high frailty ( $\geq 8$ )               | 1,982 (5.1)   |

6

7

<sup>1</sup> Includes Asian, American Indian or Alaskan Native, Native Hawaiian or Pacific Islander, or had more than one race identified.

8

<sup>2</sup> Missing data: service connection (114), Aid and Attendance benefit (3), CAN score (31).

9

<sup>3</sup> CAN scores predict hospitalization and mortality, and range from 0-99 where patients with larger values are more likely to experience hospitalization or death within a year.

10

11

Note: Veterans Integrated Services Networks (VISNs) of nearest primary care clinic results removed for conciseness.

12

13

14

15

16

17

18

19

20

21

22

23

24

25

26

27

28

29

30

31

32

33

34

35  
36

**Figure 1. Study Flow diagram.**

Ger iPACT Study

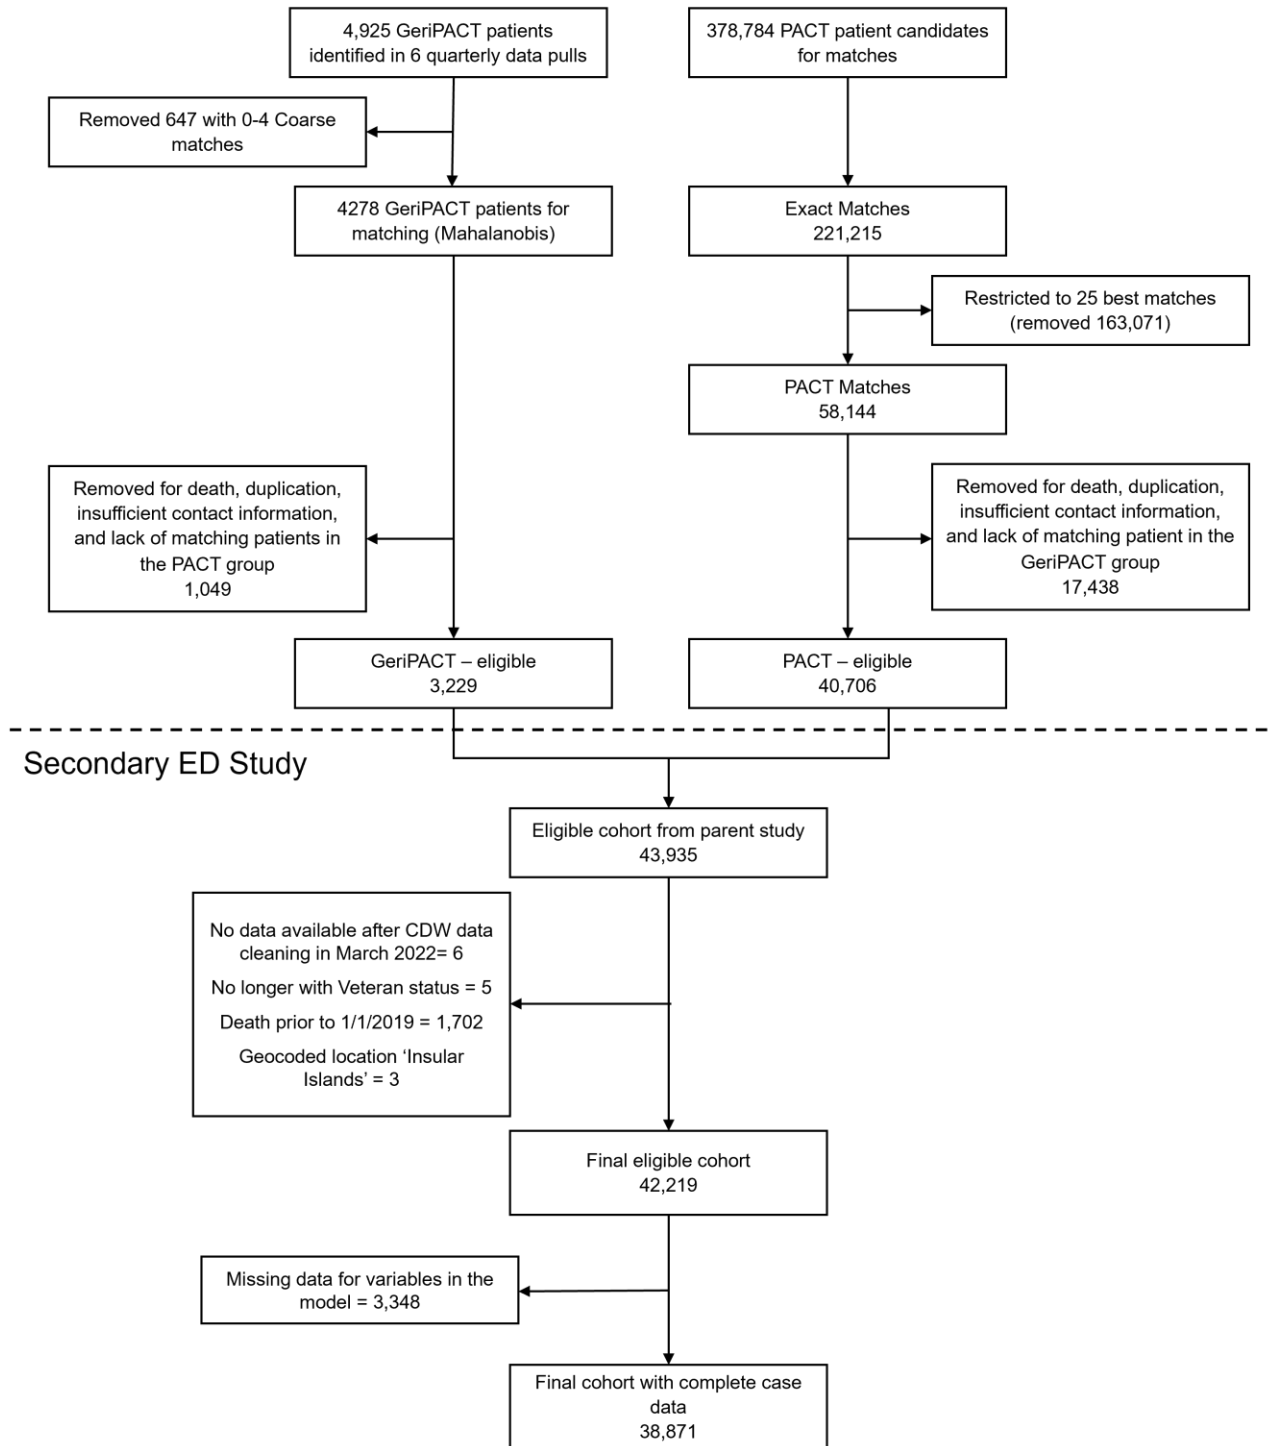

37  
38  
39  
40  
41  
42

43 **Figure 2.** Mean Estimate ED Visit Counts and 95% Confidence Intervals by Subgroups and Quarter,  
 44 Adjusted Models<sup>1</sup>  
 45

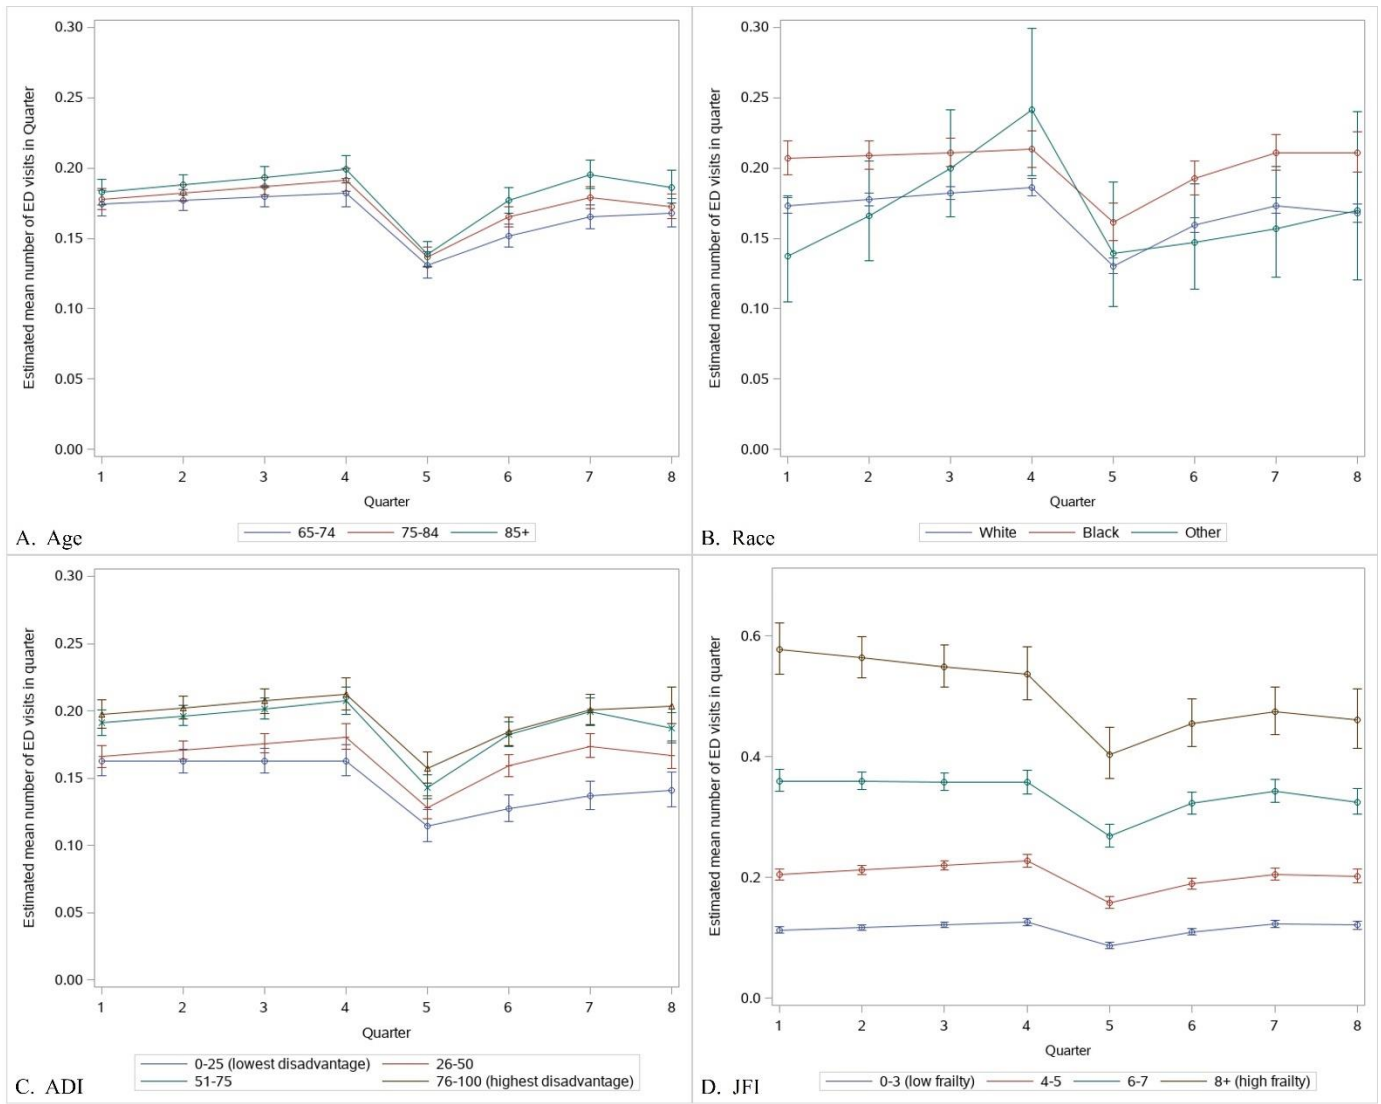

46  
 47  
 48 ED = emergency department, ADI = Area deprivation index, JFI = JEN Frailty Index  
 49

50 <sup>1</sup> Standardized to 91 days in a quarter

51 <sup>2</sup> Other race includes Asian, American Indian or Alaskan Native, Native Hawaiian or Pacific Islander, or had  
 52 more than one race identified

53 <sup>3</sup> JFI y-axis differs from other subgroups

54  
 55 Pre Covid-19: Q1=March-May 2019, Q2=June-August 2019, Q3=September-November 2019, Q4=December  
 56 2019-February 2020; Post Covid-19: Q5=March-May 2020, Q6=June-August 2020, Q7=September-November  
 57 2020, Q8=December 2020-February 2021

64  
65  
66

**Figure 3.** Estimated Rate Ratios and 95% Confidence Intervals by Subgroups and Quarter, Adjusted Models.<sup>1</sup>

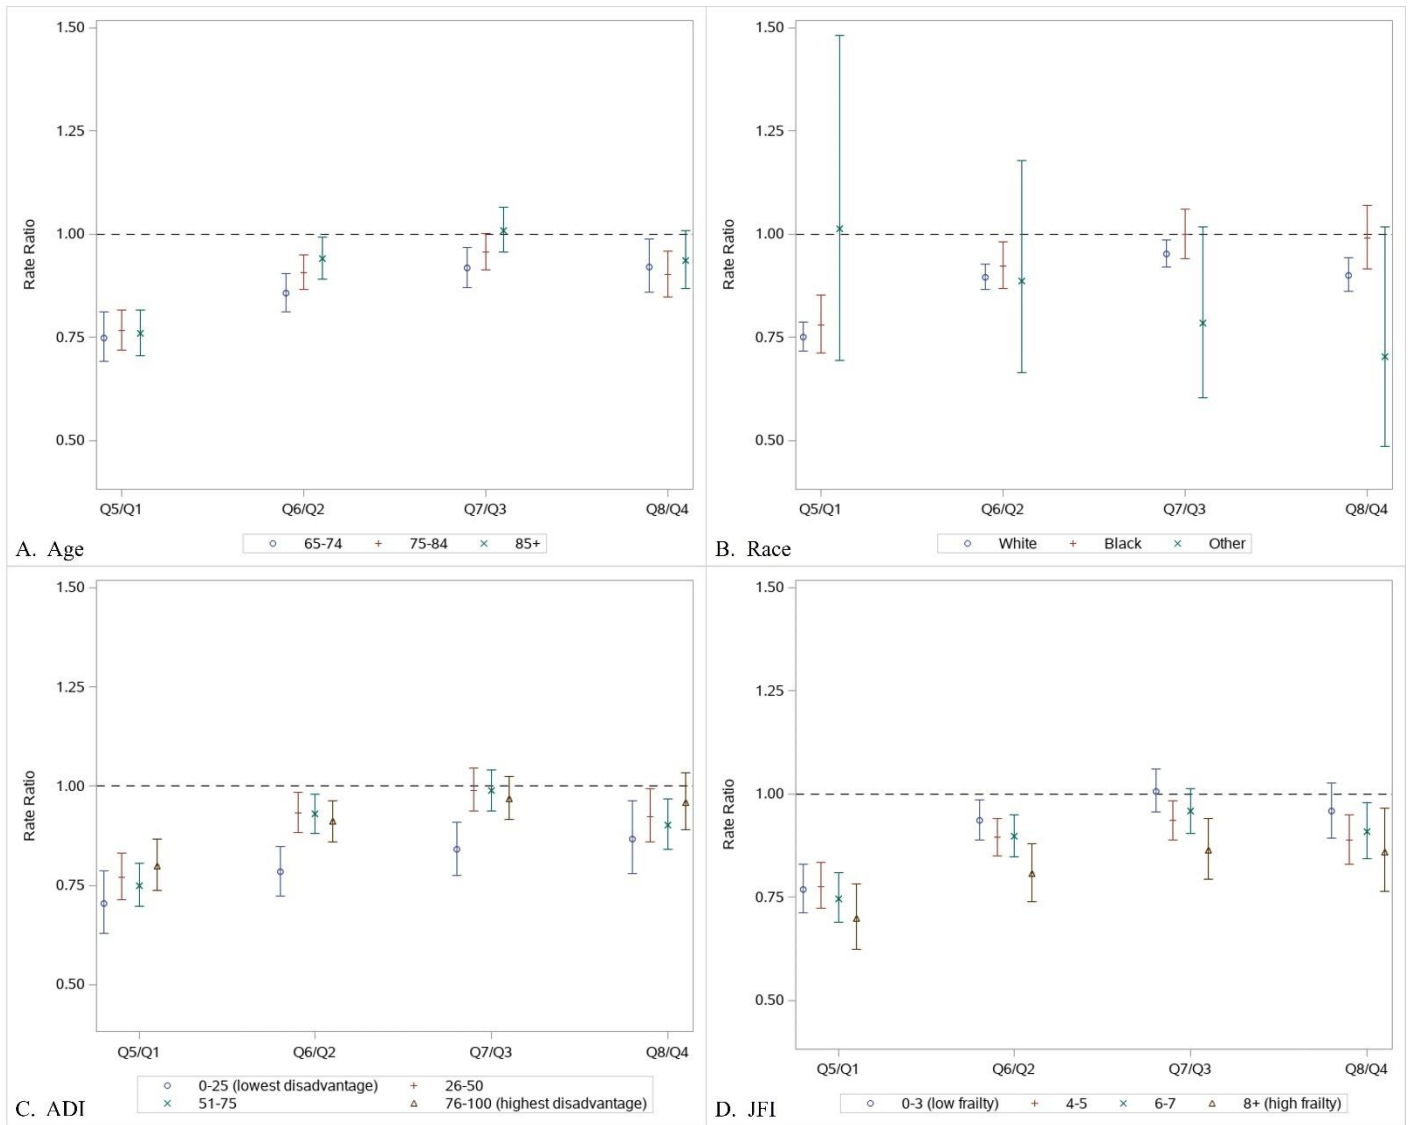

67  
68  
69  
70  
71  
72  
73  
74  
75  
76  
77  
78  
79

ED = emergency department, ADI = Area deprivation index, JFI = JEN Frailty Index

<sup>1</sup> Rate ratio = Mean estimate of number of ED visits in subgroup in Post Covid-19 quarter relative to the mean estimate of number of ED visits in the corresponding Pre Covid-19 quarter one year prior.

<sup>2</sup> Other race includes Asian, American Indian or Alaskan Native, Native Hawaiian or Pacific Islander, or had more than one race identified

Pre Covid-19: Q1=March-May 2019, Q2=June-August 2019, Q3=September-November 2019, Q4=December 2019-February 2020; Post Covid-19: Q5=March-May 2020, Q6=June-August 2020, Q7=September-November 2020, Q8=December 2020-February 2021

80  
81

82 **Legends:**

83 Figure 1. Study Flow diagram. 43,935 patients were identified as eligible for the parent  
84 GeriPACT study. For this secondary analysis, a final eligible cohort of 38,871 was identified  
85 after additional exclusion criteria and removing patients with missing data on variables in the  
86 adjusted models.

87 Figure 2. Estimated mean ED Visit Counts and 95% Confidence Intervals by Subgroups and  
88 Quarter, Adjusted Models. Models for subgroups of interest: (A) Age; (B) Race; (C) Area  
89 Deprivation Index (ADI) quartile; (D) JEN Frailty Index (JFI). Quarters are defined as Q1:  
90 March 2019–May 2019; Q2: June 2019–August 2019; Q3: September 2019– November  
91 2019; Q4: December 2019–February 2020; Q5: March 2020–May 2020; Q6: June 2020–  
92 August 2020; Q7: September 2020–November 2020; Q8: December 2020–February 2021).

93 Figure 3. Estimated Rate Ratios and 95% Confidence Intervals by Subgroups and Quarter,  
94 Adjusted Models. Estimated mean rate of ED visits per person in each of the COVID-era  
95 quarters (Q5-Q8) as compared with their seasonally equivalent pre-COVID quarter (Q1-Q4),  
96 by each subgroup of interest. Rate ratios < 1.0 indicate fewer counts of ED visits in the  
97 COVID quarter compared to the corresponding pre-COVID quarter. Models for subgroups  
98 of interest: (A) Age; (B) Race; (C) Area Deprivation Index (ADI) quartile; (D) JEN Frailty  
99 Index (JFI). Quarters are defined as Q1: March 2019–May 2019; Q2: June 2019–August  
100 2019; Q3: September 2019– November 2019; Q4: December 2019–February 2020; Q5:  
101 March 2020–May 2020; Q6: June 2020–August 2020; Q7: September 2020–November  
102 2020; Q8: December 2020–February 2021).

103

104 **Supplementary Materials**

105 Unadjusted and adjusted negative binomial regression models utilized for results below were fit with generalized  
106 estimating equations (GEEs) with clustering by individual with an autoregressive structure, coupled with  
107 empirical sandwich standard errors to account for repeated observations per person over time. Patients were  
108 censored at the time of death via an offset in the quarter of their death, and then excluded from the analysis in any  
109 quarter after that. Models included a continuous quarter variable, a Post-Covid indicator variable (0 if pre-Covid,  
110 1 if post), number of quarters since Covid (prior quarters = 0, post quarters start with 1 and goes to 4), a squared  
111 term for number of quarters since Covid, subgroup of interest, interaction terms between subgroup variables and  
112 the continuous quarter variable, interaction terms between the post-Covid indicator variable and the subgroup  
113 variables, interaction terms between the quarters since Covid variable and the subgroup variables, and interaction  
114 terms between the squared term of quarters since Covid variable and the subgroup variables. The adjusted models  
115 added the following variables centered at baseline, without duplication of the subgroup variable already entered  
116 into the model: male, the 3-level race variable, Hispanic ethnicity, married, rural status, the 4-category area  
117 deprivation index (ADI) variable, the 4-category JEN Frailty Index (JFI) variable, 4-category priority status  
118 variable, drive distance to nearest VA primary care clinic, and VISN. The 3-category age variable was included in  
119 the race and JFI subgroup models, while continuous age was used in the ADI model due to convergence issues.

120 In each table, quarters are represented as follows:

121 Pre-Covid quarters: Q1: March – May 2019; Q2: June – August 2019; Q3: September-November 2019; Q4:  
122 December 2019 – February 2020

123 Post-Covid quarters: Q5: March – May 2020; Q6: June – August 2020; Q7: September-November 2020; Q8:  
124 December 2020 – February 2021

125 Rate ratios < 1.0 indicate fewer counts of ED visits in the post-Covid quarter compared to the corresponding pre-  
126 Covid quarter. Confidence intervals not including 1.0 indicate statistical significance difference in ED visits from  
127 the post-Covid quarter compared to the corresponding pre-Covid quarter within the age subgroup.

128

129

130 **Model: Age**

131 **Table S1.** Estimated mean number of ED visits (and 95% CI) by age subgroup and quarter, standardized to 91  
 132 days in quarter.

| Quarter: Age | Unadjusted Model<br>Mean Estimate (95%<br>Confidence Interval) | Adjusted Model<br>Mean Estimate (95%<br>Confidence Interval) |
|--------------|----------------------------------------------------------------|--------------------------------------------------------------|
| Q1: 65-74    | 0.247 (0.235, 0.260)                                           | 0.175 (0.166, 0.184)                                         |
| Q1: 75-84    | 0.214 (0.206, 0.224)                                           | 0.178 (0.171, 0.186)                                         |
| Q1: 85+      | 0.219 (0.209, 0.230)                                           | 0.183 (0.174, 0.192)                                         |
| Q2: 65-74    | 0.247 (0.237, 0.258)                                           | 0.177 (0.170, 0.185)                                         |
| Q2: 75-84    | 0.218 (0.211, 0.226)                                           | 0.182 (0.177, 0.188)                                         |
| Q2: 85+      | 0.223 (0.215, 0.232)                                           | 0.188 (0.181, 0.195)                                         |
| Q3: 65-74    | 0.248 (0.238, 0.258)                                           | 0.180 (0.172, 0.188)                                         |
| Q3: 75-84    | 0.222 (0.215, 0.230)                                           | 0.187 (0.181, 0.193)                                         |
| Q3: 85+      | 0.228 (0.219, 0.236)                                           | 0.193 (0.186, 0.201)                                         |
| Q4: 65-74    | 0.248 (0.236, 0.262)                                           | 0.182 (0.173, 0.193)                                         |
| Q4: 75-84    | 0.226 (0.217, 0.236)                                           | 0.191 (0.183, 0.200)                                         |
| Q4: 85+      | 0.232 (0.221, 0.243)                                           | 0.199 (0.189, 0.209)                                         |
| Q5: 65-74    | 0.183 (0.170, 0.196)                                           | 0.131 (0.122, 0.141)                                         |
| Q5: 75-84    | 0.162 (0.153, 0.171)                                           | 0.137 (0.129, 0.144)                                         |
| Q5: 85+      | 0.162 (0.152, 0.173)                                           | 0.139 (0.130, 0.148)                                         |
| Q6: 65-74    | 0.208 (0.197, 0.219)                                           | 0.152 (0.144, 0.160)                                         |
| Q6: 75-84    | 0.193 (0.185, 0.202)                                           | 0.165 (0.158, 0.173)                                         |
| Q6: 85+      | 0.203 (0.193, 0.214)                                           | 0.177 (0.168, 0.186)                                         |
| Q7: 65-74    | 0.223 (0.212, 0.234)                                           | 0.165 (0.157, 0.174)                                         |
| Q7: 75-84    | 0.207 (0.199, 0.216)                                           | 0.179 (0.171, 0.187)                                         |
| Q7: 85+      | 0.220 (0.209, 0.232)                                           | 0.195 (0.185, 0.206)                                         |
| Q8: 65-74    | 0.226 (0.213, 0.240)                                           | 0.168 (0.158, 0.178)                                         |
| Q8: 75-84    | 0.200 (0.190, 0.210)                                           | 0.173 (0.164, 0.182)                                         |
| Q8: 85+      | 0.208 (0.196, 0.222)                                           | 0.186 (0.175, 0.199)                                         |

133



134 **Table S2.** Rate Ratios Comparing Each Quarter to the Seasonally Equivalent Pre-COVID-19 Quarter by Age  
 135 Group

| Quarters in<br>Rate Ratio:<br>Age | Unadjusted Model<br>Rate Ratio<br>(95% Confidence Interval) | Adjusted Model<br>Rate Ratio<br>(95% Confidence Interval) |
|-----------------------------------|-------------------------------------------------------------|-----------------------------------------------------------|
| Q5/Q1: 65-74                      | 0.739 (0.683, 0.801)                                        | 0.750 (0.693, 0.812)                                      |
| Q5/Q1: 75-84                      | 0.755 (0.710, 0.804)                                        | 0.767 (0.720, 0.817)                                      |
| Q5/Q1: 85+                        | 0.740 (0.689, 0.795)                                        | 0.759 (0.705, 0.817)                                      |
| Q6/Q2: 65-74                      | 0.839 (0.796, 0.885)                                        | 0.857 (0.813, 0.905)                                      |
| Q6/Q2: 75-84                      | 0.887 (0.847, 0.928)                                        | 0.907 (0.866, 0.950)                                      |
| Q6/Q2: 85+                        | 0.908 (0.861, 0.958)                                        | 0.942 (0.892, 0.994)                                      |
| Q7/Q3: 65-74                      | 0.900 (0.855, 0.947)                                        | 0.918 (0.872, 0.967)                                      |
| Q7/Q3: 75-84                      | 0.934 (0.893, 0.978)                                        | 0.957 (0.914, 1.002)                                      |
| Q7/Q3: 85+                        | 0.969 (0.918, 1.022)                                        | 1.010 (0.956, 1.067)                                      |
| Q8/Q4: 65-74                      | 0.911 (0.852, 0.975)                                        | 0.921 (0.859, 0.988)                                      |
| Q8/Q4: 75-84                      | 0.883 (0.832, 0.938)                                        | 0.902 (0.848, 0.959)                                      |
| Q8/Q4: 85+                        | 0.900 (0.836, 0.965)                                        | 0.937 (0.870, 1.009)                                      |

136  
 137 In joint tests assessing differential changes over time by age group, for both unadjusted and adjusted models, there  
 138 were no statistically significant differences in the post-Covid/corresponding pre-Covid quarter rate ratios by age  
 139 subgroups.

140

141 **Model: Race**

142 **Table S3.** Estimated mean number of ED visits (and 95% CI) by race subgroup and quarter, standardized to 91  
 143 days in quarter.

| Quarter: Race | Unadjusted Model<br>Mean Estimate<br>(95% Confidence Interval) | Adjusted Model<br>Mean Estimate<br>(95% Confidence Interval) |
|---------------|----------------------------------------------------------------|--------------------------------------------------------------|
| Q1: White     | 0.212 (0.206, 0.219)                                           | 0.173 (0.168, 0.179)                                         |
| Q1: Black     | 0.282 (0.267, 0.298)                                           | 0.207 (0.195, 0.219)                                         |
| Q1: Other     | 0.167 (0.127, 0.220)                                           | 0.137 (0.105, 0.180)                                         |
| Q2: White     | 0.215 (0.210, 0.221)                                           | 0.178 (0.173, 0.182)                                         |
| Q2: Black     | 0.283 (0.270, 0.296)                                           | 0.209 (0.199, 0.219)                                         |
| Q2: Other     | 0.199 (0.160, 0.249)                                           | 0.166 (0.134, 0.205)                                         |
| Q3: White     | 0.218 (0.213, 0.224)                                           | 0.182 (0.178, 0.187)                                         |
| Q3: Black     | 0.283 (0.271, 0.296)                                           | 0.211 (0.201, 0.222)                                         |
| Q3: Other     | 0.237 (0.194, 0.291)                                           | 0.200 (0.166, 0.242)                                         |
| Q4: White     | 0.222 (0.215, 0.229)                                           | 0.186 (0.180, 0.192)                                         |
| Q4: Black     | 0.284 (0.268, 0.301)                                           | 0.213 (0.201, 0.227)                                         |
| Q4: Other     | 0.282 (0.226, 0.354)                                           | 0.241 (0.195, 0.299)                                         |
| Q5: White     | 0.156 (0.150, 0.163)                                           | 0.130 (0.125, 0.136)                                         |
| Q5: Black     | 0.217 (0.200, 0.236)                                           | 0.161 (0.148, 0.175)                                         |
| Q5: Other     | 0.164 (0.120, 0.223)                                           | 0.139 (0.102, 0.190)                                         |
| Q6: White     | 0.188 (0.182, 0.194)                                           | 0.159 (0.154, 0.165)                                         |
| Q6: Black     | 0.254 (0.240, 0.269)                                           | 0.193 (0.181, 0.205)                                         |
| Q6: Other     | 0.171 (0.131, 0.222)                                           | 0.147 (0.114, 0.189)                                         |
| Q7: White     | 0.202 (0.196, 0.209)                                           | 0.173 (0.168, 0.179)                                         |
| Q7: Black     | 0.275 (0.260, 0.290)                                           | 0.211 (0.199, 0.224)                                         |
| Q7: Other     | 0.183 (0.141, 0.236)                                           | 0.157 (0.122, 0.201)                                         |
| Q8 -White     | 0.194 (0.187, 0.202)                                           | 0.168 (0.162, 0.175)                                         |
| Q8: Black     | 0.275 (0.258, 0.294)                                           | 0.211 (0.197, 0.226)                                         |
| Q8: Other     | 0.201 (0.143, 0.282)                                           | 0.170 (0.120, 0.240)                                         |

144 Other race includes Asian, American Indian or Alaskan Native, Native Hawaiian or Pacific Islander, or had more  
 145 than one race identified

146

147

148 **Table S4.** Rate Ratios Comparing Each Quarter to the Seasonally Equivalent Pre-COVID-19 Quarter by Race  
 149 Group

| Quarters in<br>Rate Ratio:<br>Race | Unadjusted Model<br>Rate Ratio<br>(95% Confidence Interval) | Adjusted Model<br>Rate Ratio<br>(95% Confidence Interval) |
|------------------------------------|-------------------------------------------------------------|-----------------------------------------------------------|
| Q5/Q1: White                       | 0.737 (0.704, 0.771)                                        | 0.752 (0.718, 0.788)                                      |
| Q5/Q1: Black                       | 0.769 (0.703, 0.842)                                        | 0.780 (0.712, 0.854)                                      |
| Q5/Q1: Other                       | 0.978 (0.690, 1.387)                                        | 1.014 (0.694, 1.482)                                      |
| Q6/Q2: White                       | 0.873 (0.844, 0.903)                                        | 0.897 (0.867, 0.927)                                      |
| Q6/Q2: Black                       | 0.897 (0.846, 0.952)                                        | 0.923 (0.869, 0.981)                                      |
| Q6/Q2: Other                       | 0.857 (0.647, 1.134)                                        | 0.886 (0.666, 1.180)                                      |
| Q7/Q3: White                       | 0.925 (0.895, 0.957)                                        | 0.952 (0.921, 0.985)                                      |
| Q7/Q3: Black                       | 0.969 (0.915, 1.027)                                        | 1.000 (0.942, 1.061)                                      |
| Q7/Q3: Other                       | 0.770 (0.592, 1.001)                                        | 0.784 (0.604, 1.019)                                      |
| Q8/Q4: White                       | 0.877 (0.839, 0.917)                                        | 0.901 (0.861, 0.943)                                      |
| Q8/Q4: Black                       | 0.970 (0.899, 1.046)                                        | 0.990 (0.915, 1.071)                                      |
| Q8/Q4: Other                       | 0.710 (0.498, 1.014)                                        | 0.704 (0.486, 1.019)                                      |

150  
 151 In joint tests assessing differential changes over time by race group, for both unadjusted and adjusted models there  
 152 were statistically significant differences in the 4<sup>th</sup> post-Covid/corresponding pre-Covid quarter rate ratios by race  
 153 subgroups (p=0.040, 0.049, respectively). In pairwise comparisons, patients of White race experienced a  
 154 significantly greater decrease in ED visits compared to patients of Black race in the 4<sup>th</sup> quarter post-Covid  
 155 compared to the 4<sup>th</sup> quarter pre-Covid (p=0.025 in unadjusted model, p=0.042 in adjusted model).

156  
 157

158 **Model: Area Deprivation Index (ADI)**

159 **Table S5.** Estimated mean number of ED visits (and 95% CI) by ADI subgroup and quarter, standardized to 91  
 160 days in quarter.

| Quarter: ADI subgroups | Unadjusted Model Mean Estimate (95% Confidence Interval) | Adjusted Model Mean Estimate (95% Confidence Interval) |
|------------------------|----------------------------------------------------------|--------------------------------------------------------|
| Q1: 0-25               | 0.191 (0.178, 0.205)                                     | 0.162 (0.152, 0.174)                                   |
| Q1: 26-50              | 0.194 (0.184, 0.203)                                     | 0.166 (0.158, 0.174)                                   |
| Q1: 51-75              | 0.240 (0.229, 0.253)                                     | 0.191 (0.182, 0.201)                                   |
| Q1: 76-100             | 0.274 (0.260, 0.288)                                     | 0.197 (0.187, 0.208)                                   |
| Q2: 0-25               | 0.189 (0.179, 0.200)                                     | 0.163 (0.154, 0.172)                                   |
| Q2: 26-50              | 0.197 (0.190, 0.205)                                     | 0.171 (0.164, 0.177)                                   |
| Q2: 51-75              | 0.245 (0.236, 0.255)                                     | 0.196 (0.189, 0.204)                                   |
| Q2: 76-100             | 0.277 (0.266, 0.289)                                     | 0.202 (0.194, 0.211)                                   |
| Q3: 0-25               | 0.188 (0.177, 0.199)                                     | 0.163 (0.154, 0.172)                                   |
| Q3: 26-50              | 0.201 (0.193, 0.210)                                     | 0.176 (0.169, 0.183)                                   |
| Q3: 51-75              | 0.250 (0.240, 0.260)                                     | 0.202 (0.194, 0.210)                                   |
| Q3: 76-100             | 0.281 (0.269, 0.293)                                     | 0.207 (0.198, 0.216)                                   |
| Q4: 0-25               | 0.186 (0.173, 0.200)                                     | 0.163 (0.152, 0.175)                                   |
| Q4: 26-50              | 0.205 (0.195, 0.217)                                     | 0.181 (0.171, 0.190)                                   |
| Q4: 51-75              | 0.255 (0.242, 0.267)                                     | 0.207 (0.197, 0.218)                                   |
| Q4: 76-100             | 0.284 (0.270, 0.300)                                     | 0.212 (0.201, 0.224)                                   |
| Q5: 0-25               | 0.133 (0.121, 0.148)                                     | 0.114 (0.103, 0.126)                                   |
| Q5: 26-50              | 0.146 (0.137, 0.156)                                     | 0.128 (0.120, 0.137)                                   |
| Q5: 51-75              | 0.176 (0.166, 0.187)                                     | 0.143 (0.135, 0.152)                                   |
| Q5: 76-100             | 0.214 (0.199, 0.231)                                     | 0.158 (0.146, 0.169)                                   |
| Q6: 0-25               | 0.146 (0.135, 0.157)                                     | 0.127 (0.118, 0.138)                                   |
| Q6: 26-50              | 0.178 (0.169, 0.188)                                     | 0.159 (0.151, 0.167)                                   |
| Q6: 51-75              | 0.220 (0.210, 0.231)                                     | 0.182 (0.173, 0.192)                                   |
| Q6: 76-100             | 0.247 (0.234, 0.261)                                     | 0.184 (0.174, 0.195)                                   |
| Q7: 0-25               | 0.154 (0.143, 0.166)                                     | 0.137 (0.127, 0.147)                                   |
| Q7: 26-50              | 0.193 (0.184, 0.203)                                     | 0.174 (0.165, 0.183)                                   |
| Q7: 51-75              | 0.238 (0.227, 0.250)                                     | 0.199 (0.190, 0.209)                                   |
| Q7: 76-100             | 0.266 (0.252, 0.281)                                     | 0.201 (0.19, 0.212)                                    |
| Q8: 0-25               | 0.157 (0.144, 0.172)                                     | 0.141 (0.129, 0.155)                                   |
| Q8: 26-50              | 0.186 (0.175, 0.198)                                     | 0.167 (0.157, 0.177)                                   |
| Q8: 51-75              | 0.223 (0.211, 0.237)                                     | 0.187 (0.176, 0.198)                                   |
| Q8: 76-100             | 0.267 (0.250, 0.284)                                     | 0.204 (0.191, 0.217)                                   |

161 ADI is in quartiles of 0-25 (least disadvantage), 26-50, 51-75, 76-100 (most disadvantage)

162

163

164

165 **Table S6.** Rate Ratios Comparing Each Quarter to the Seasonally Equivalent Pre-COVID-19 Quarter by ADI  
 166 Group

| Quarters in<br>Rate Ratio:<br>ADI | Unadjusted Model<br>Rate Ratio<br>(95% Confidence Interval) | Adjusted Model<br>Rate Ratio<br>(95% Confidence Interval) |
|-----------------------------------|-------------------------------------------------------------|-----------------------------------------------------------|
| Q5/Q1: 0-25                       | 0.698 (0.625, 0.781)                                        | 0.703 (0.628, 0.787)                                      |
| Q5/Q1: 26-50                      | 0.754 (0.699, 0.813)                                        | 0.770 (0.714, 0.831)                                      |
| Q5/Q1: 51-75                      | 0.731 (0.682, 0.785)                                        | 0.749 (0.697, 0.806)                                      |
| Q5/Q1: 76-<br>100                 | 0.783 (0.722, 0.850)                                        | 0.798 (0.736, 0.866)                                      |
| Q6/Q2: 0-25                       | 0.769 (0.710, 0.832)                                        | 0.783 (0.723, 0.848)                                      |
| Q6/Q2: 26-50                      | 0.903 (0.856, 0.953)                                        | 0.932 (0.883, 0.984)                                      |
| Q6/Q2: 51-75                      | 0.898 (0.853, 0.946)                                        | 0.929 (0.881, 0.980)                                      |
| Q6/Q2: 76-<br>100                 | 0.891 (0.842, 0.943)                                        | 0.911 (0.860, 0.964)                                      |
| Q7/Q3: 0-25                       | 0.819 (0.757, 0.885)                                        | 0.840 (0.775, 0.910)                                      |
| Q7/Q3: 26-50                      | 0.960 (0.910, 1.014)                                        | 0.990 (0.937, 1.046)                                      |
| Q7/Q3: 51-75                      | 0.954 (0.907, 1.004)                                        | 0.988 (0.938, 1.041)                                      |
| Q7/Q3: 76-<br>100                 | 0.946 (0.895, 1.000)                                        | 0.968 (0.915, 1.024)                                      |
| Q8/Q4: 0-25                       | 0.844 (0.762, 0.935)                                        | 0.866 (0.779, 0.963)                                      |
| Q8/Q4: 26-50                      | 0.907 (0.844, 0.975)                                        | 0.924 (0.859, 0.994)                                      |
| Q8/Q4: 51-75                      | 0.877 (0.819, 0.940)                                        | 0.902 (0.840, 0.968)                                      |
| Q8/Q4: 76-<br>100                 | 0.938 (0.872, 1.008)                                        | 0.959 (0.890, 1.033)                                      |

167  
 168 In joint tests assessing differential changes over time by ADI group, for both unadjusted and adjusted models  
 169 there were statistically significant differences in the 2<sup>nd</sup> and 3<sup>rd</sup> post-Covid/corresponding pre-Covid quarter rate  
 170 ratios by ADI subgroups (p-values <0.01). In pairwise comparisons, patients in the least disadvantaged ADI  
 171 subgroup (0-25) experienced a greater decrease in ED visits compared to patients in more disadvantaged ADI  
 172 subgroups (26-50, 51-75, 76-100) in the 2<sup>nd</sup> and 3<sup>rd</sup> quarters post-Covid compared to the corresponding pre-Covid  
 173 quarters (all p-values < 0.01 in unadjusted and adjusted models).

174  
 175  
 176

177 **Model: JEN Frailty Index (JFI)**

178 **Table S7.** Mean number of estimated ED visits (and 95% CI) by frailty subgroup and quarter, standardized to 91  
 179 days in quarter.

| Quarter: JFI subgroups | Unadjusted Model Mean Estimate (95% Confidence Interval) | Adjusted Model Mean Estimate (95% Confidence Interval) |
|------------------------|----------------------------------------------------------|--------------------------------------------------------|
| Q1: 0-3                | 0.116 (0.110, 0.122)                                     | 0.113 (0.107, 0.118)                                   |
| Q1: 4-5                | 0.225 (0.215, 0.236)                                     | 0.204 (0.195, 0.214)                                   |
| Q1: 6-7                | 0.416 (0.395, 0.437)                                     | 0.360 (0.342, 0.379)                                   |
| Q1: 8+                 | 0.681 (0.634, 0.731)                                     | 0.577 (0.536, 0.621)                                   |
| Q2: 0-3                | 0.120 (0.116, 0.125)                                     | 0.117 (0.113, 0.121)                                   |
| Q2: 4-5                | 0.233 (0.225, 0.241)                                     | 0.212 (0.204, 0.219)                                   |
| Q2: 6-7                | 0.414 (0.399, 0.431)                                     | 0.359 (0.345, 0.374)                                   |
| Q2: 8+                 | 0.666 (0.629, 0.706)                                     | 0.563 (0.530, 0.598)                                   |
| Q3: 0-3                | 0.125 (0.120, 0.129)                                     | 0.121 (0.117, 0.126)                                   |
| Q3: 4-5                | 0.241 (0.233, 0.250)                                     | 0.219 (0.212, 0.228)                                   |
| Q3: 6-7                | 0.413 (0.397, 0.430)                                     | 0.358 (0.343, 0.373)                                   |
| Q3: 8+                 | 0.652 (0.613, 0.693)                                     | 0.549 (0.515, 0.585)                                   |
| Q4: 0-3                | 0.129 (0.123, 0.136)                                     | 0.126 (0.120, 0.132)                                   |
| Q4: 4-5                | 0.250 (0.238, 0.262)                                     | 0.227 (0.217, 0.239)                                   |
| Q4: 6-7                | 0.412 (0.391, 0.435)                                     | 0.357 (0.338, 0.377)                                   |
| Q4: 8+                 | 0.638 (0.590, 0.691)                                     | 0.536 (0.494, 0.581)                                   |
| Q5: 0-3                | 0.090 (0.084, 0.096)                                     | 0.087 (0.081, 0.092)                                   |
| Q5: 4-5                | 0.174 (0.163, 0.186)                                     | 0.158 (0.149, 0.169)                                   |
| Q5: 6-7                | 0.313 (0.292, 0.336)                                     | 0.269 (0.251, 0.289)                                   |
| Q5: 8+                 | 0.486 (0.439, 0.538)                                     | 0.403 (0.363, 0.448)                                   |
| Q6: 0-3                | 0.112 (0.107, 0.118)                                     | 0.109 (0.104, 0.115)                                   |
| Q6: 4-5                | 0.208 (0.199, 0.219)                                     | 0.189 (0.181, 0.199)                                   |
| Q6: 6-7                | 0.373 (0.353, 0.393)                                     | 0.322 (0.305, 0.341)                                   |
| Q6: 8+                 | 0.539 (0.495, 0.586)                                     | 0.454 (0.417, 0.495)                                   |
| Q7: 0-3                | 0.125 (0.119, 0.131)                                     | 0.122 (0.117, 0.128)                                   |
| Q7: 4-5                | 0.226 (0.215, 0.237)                                     | 0.205 (0.196, 0.215)                                   |
| Q7: 6-7                | 0.397 (0.376, 0.418)                                     | 0.343 (0.325, 0.362)                                   |
| Q7: 8+                 | 0.559 (0.515, 0.605)                                     | 0.475 (0.437, 0.516)                                   |
| Q8: 0-3                | 0.124 (0.117, 0.131)                                     | 0.121 (0.114, 0.128)                                   |
| Q8: 4-5                | 0.222 (0.210, 0.235)                                     | 0.202 (0.191, 0.214)                                   |
| Q8: 6-7                | 0.378 (0.355, 0.403)                                     | 0.325 (0.304, 0.346)                                   |
| Q8: 8+                 | 0.541 (0.488, 0.601)                                     | 0.460 (0.413, 0.513)                                   |

180 JFI: Low frailty 0-3, moderate frailty 4-5, high frailty 6-7, very high frailty  $\geq 8$ .

181

182

183

184  
185

**Table S8.** Rate Ratios Comparing Each Quarter to the Seasonally Equivalent Pre-COVID-19 Quarter by JFI Group

| Quarters in Rate Ratio: JFI | Unadjusted Model Rate Ratio (95% Confidence Interval) | Adjusted Model Rate Ratio (95% Confidence Interval) |
|-----------------------------|-------------------------------------------------------|-----------------------------------------------------|
| Q5/Q1: 0-3                  | 0.774 (0.718, 0.835)                                  | 0.770 (0.713, 0.830)                                |
| Q5/Q1: 4-5                  | 0.774 (0.720, 0.832)                                  | 0.777 (0.723, 0.834)                                |
| Q5/Q1: 6-7                  | 0.754 (0.698, 0.815)                                  | 0.747 (0.690, 0.809)                                |
| Q5/Q1: 8+                   | 0.714 (0.638, 0.798)                                  | 0.699 (0.624, 0.783)                                |
| Q6/Q2: 0-3                  | 0.934 (0.886, 0.985)                                  | 0.936 (0.888, 0.987)                                |
| Q6/Q2: 4-5                  | 0.894 (0.850, 0.940)                                  | 0.895 (0.851, 0.942)                                |
| Q6/Q2: 6-7                  | 0.899 (0.850, 0.951)                                  | 0.898 (0.848, 0.950)                                |
| Q6/Q2: 8+                   | 0.809 (0.741, 0.882)                                  | 0.807 (0.739, 0.881)                                |
| Q7/Q3: 0-3                  | 1.003 (0.952, 1.057)                                  | 1.007 (0.956, 1.061)                                |
| Q7/Q3: 4-5                  | 0.936 (0.890, 0.985)                                  | 0.936 (0.890, 0.985)                                |
| Q7/Q3: 6-7                  | 0.959 (0.907, 1.014)                                  | 0.958 (0.906, 1.014)                                |
| Q7/Q3: 8+                   | 0.857 (0.787, 0.932)                                  | 0.864 (0.794, 0.941)                                |
| Q8/Q4: 0-3                  | 0.958 (0.894, 1.027)                                  | 0.959 (0.895, 1.028)                                |
| Q8/Q4: 4-5                  | 0.888 (0.831, 0.949)                                  | 0.889 (0.831, 0.951)                                |
| Q8/Q4: 6-7                  | 0.917 (0.851, 0.988)                                  | 0.909 (0.843, 0.980)                                |
| Q8/Q4: 8+                   | 0.848 (0.756, 0.952)                                  | 0.859 (0.764, 0.965)                                |

186  
187  
188  
189  
190  
191  
192  
193  
194  
195  
196  
197  
198  
  
199  
  
200  
201

In joint tests assessing differential changes over time by JFI group, there were statistically significant differences in the 2<sup>nd</sup> post-Covid/corresponding pre-Covid quarter rate ratios (adjusted model p=0.045) and in the 3<sup>rd</sup> post-Covid/corresponding pre-Covid quarter rate ratios (unadjusted model p=0.017, adjusted model p=0.022) by JFI subgroups. In pairwise comparisons for the adjusted model, patients in the highest frailty subgroup (8+) experienced a greater decrease in ED visits compared to patients in the lower frailty subgroups (0-3, p=0.004; 4-5, p=0.045; 6-7, p=0.045) in the 2<sup>nd</sup> quarter post-Covid compared to the corresponding pre-Covid quarter. In both unadjusted and adjusted models, patients in the highest frailty subgroup had a greater decrease in ED visits compared to patients in the 0-3 frailty subgroup (unadjusted model p=0.002, adjusted model p=0.003) and the 6-7 frailty subgroup (unadjusted model p=0.029, adjusted model p=0.048) in the 3<sup>rd</sup> quarter post-Covid compared to the corresponding pre-Covid quarter. Additionally, in the adjusted model patients in the 4-5 frailty subgroup had a greater decrease in ED visits compared to patients in the 0-3 frailty subgroup in the 3<sup>rd</sup> quarter post-Covid compared to the corresponding pre-Covid quarter (p=0.049).
